# Supplementary material for: Biomimetic model for [FeFe]-hydrogenase: asymmetrically disubstituted diiron complex with a redox-active 2,2′-bipyridyl ligand
Source: Royal Society of Chemistry journal article supplement (doi:10.1039/c2dt32457a), 2012-12-21
Supplement: c2dt32457a.pdf [file c2dt32457a.pdf]

Biomimetic model for [FeFe]-hydrogenase:  
Asymmetrically disubstituted diiron complex  
with a redox-active 2,2'-bipyridyl ligand

*Souvik Roy<sup>‡,§</sup>, Thomas L. Groy<sup>‡</sup>, Anne K. Jones<sup>‡,§\*</sup>*

<sup>‡</sup>Department of Chemistry and Biochemistry; <sup>§</sup>Center for Bio-Inspired Solar Fuel

Production, Arizona State University, Tempe, AZ, 85287, USA

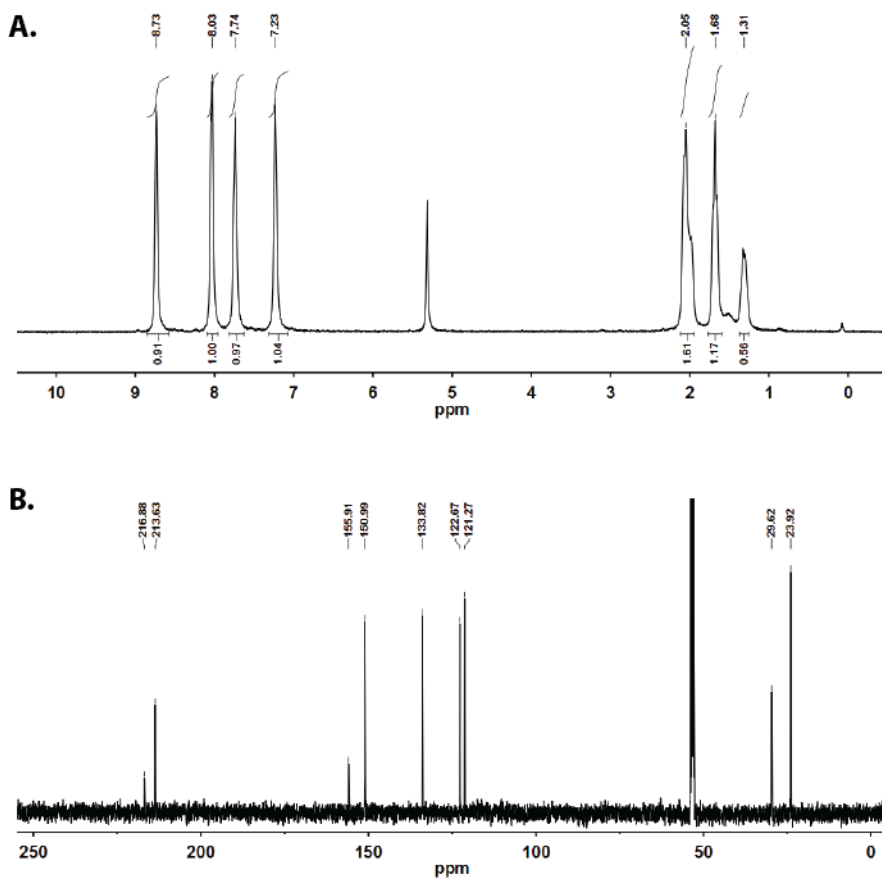

Figure S1. (A) <sup>1</sup>H NMR spectrum and (B) <sup>13</sup>C NMR spectrum of **1** in CD<sub>2</sub>Cl<sub>2</sub>.

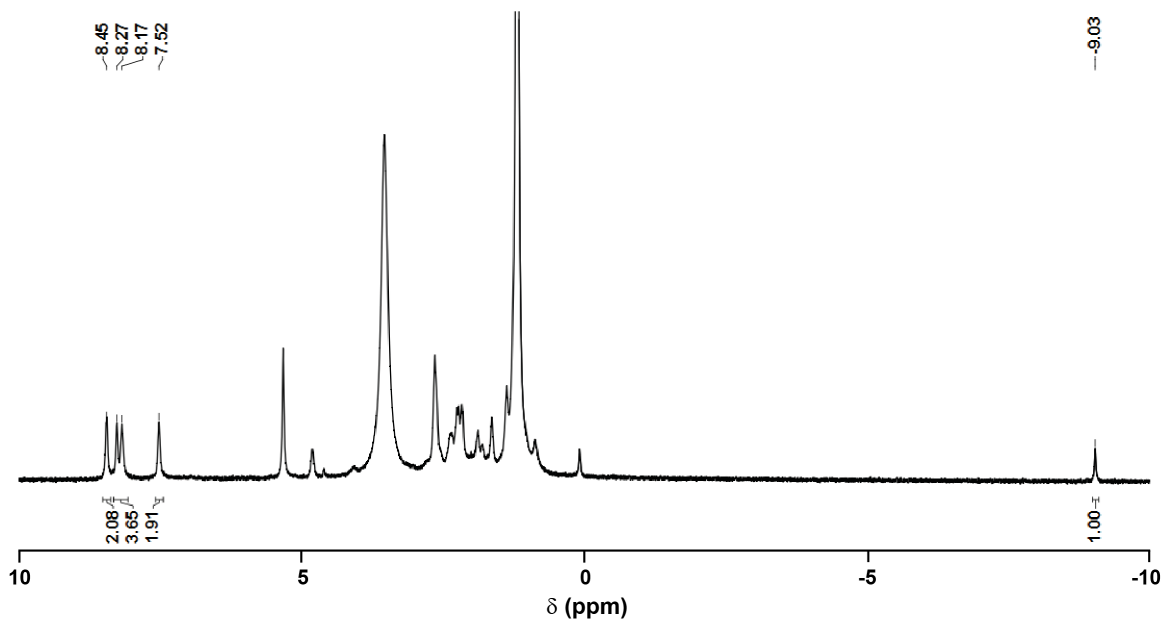

Figure S2. <sup>1</sup>H NMR of **1** (10 mM) in CD<sub>2</sub>Cl<sub>2</sub> in presence of 3 equivalents of HBF<sub>4</sub>·OEt<sub>2</sub>.

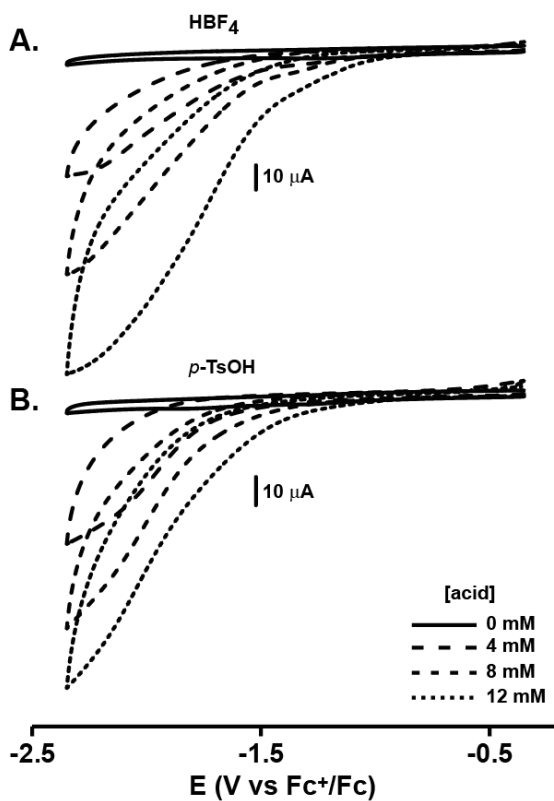

**Figure S3.** Cyclic voltammograms of (A) HBF<sub>4</sub> and (B) *p*-TsOH in acetonitrile solution (0.1 M *n*-Bu<sub>4</sub>NPF<sub>6</sub>) using a glassy carbon working electrode at scan rate of 0.2 V s<sup>-1</sup>.
